# Supplementary material for: Development of antibacterial hydrogel using endophytic Alternaria fungus extract isolated from Australian native plant
Source: Royal Society of Chemistry journal article supplement (doi:10.1039/d5tb01529d), 2025-01-01
Supplement: d5tb01529d1.pdf [file d5tb01529d1.pdf]

### Supplementary Materials

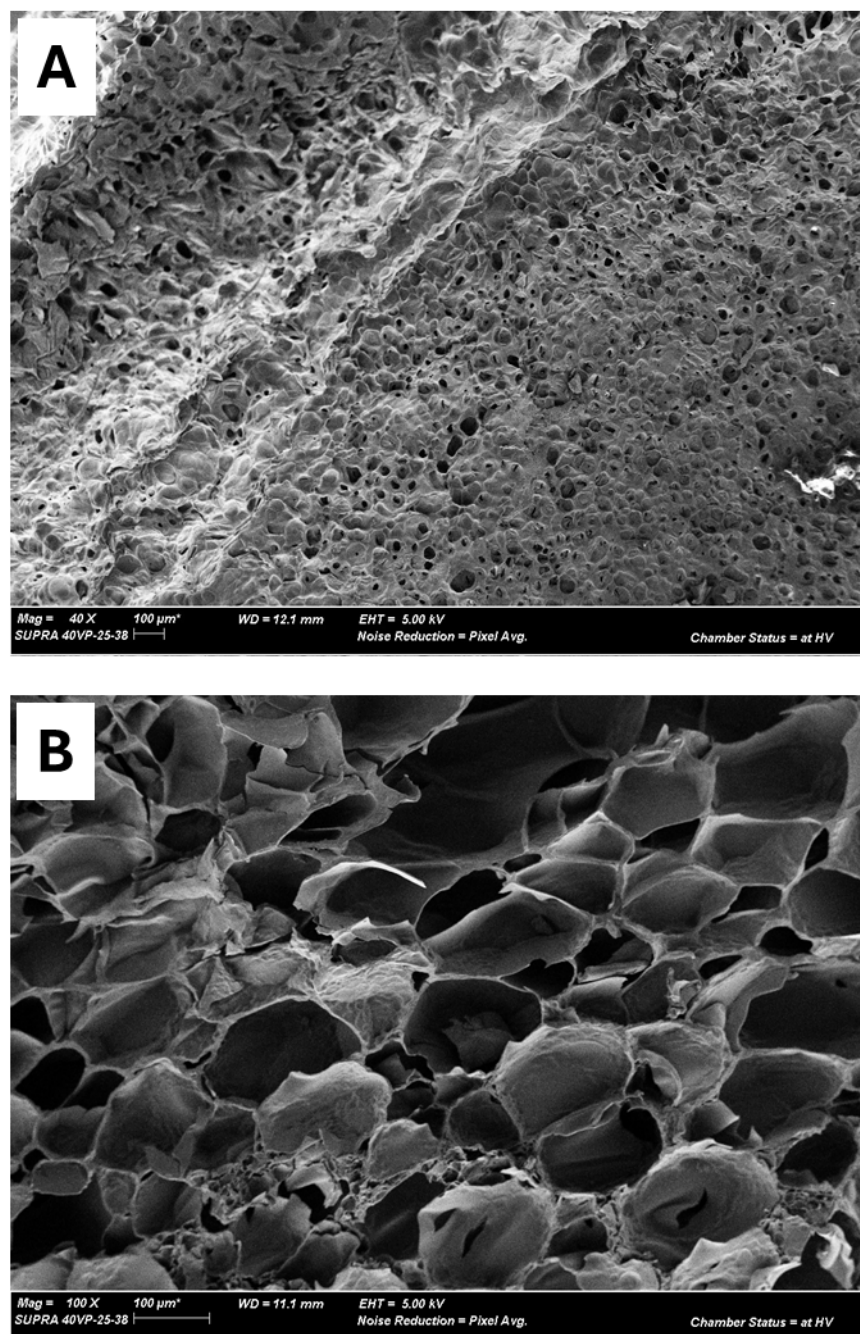

**Figure S1:** Scanning electron microscopy image of 10 % GelMA showing the surface (A) at a magnification of 40x (A). Zoomed cross section image of the 10 % GelMA at magnification 100x (B).

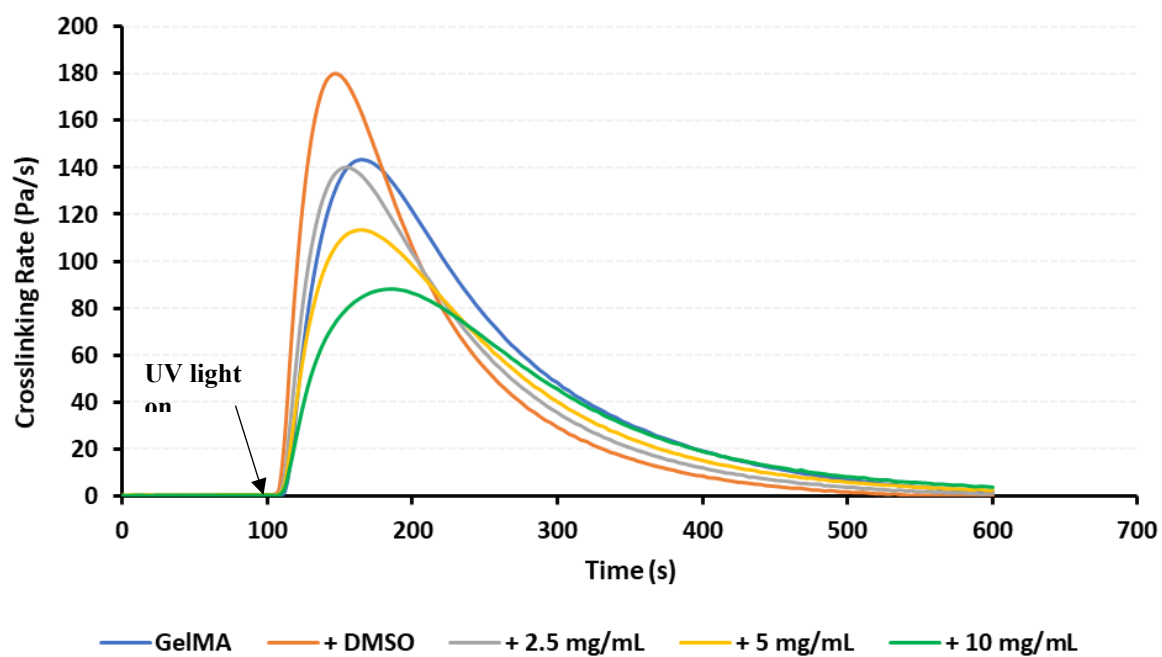

**Figure S2:** The crosslinking reaction rate of 10 % GelMA composites as a function of time and the effects of DMSO and different extract concentrations. For all experiments, the light source was activated after 100 s.

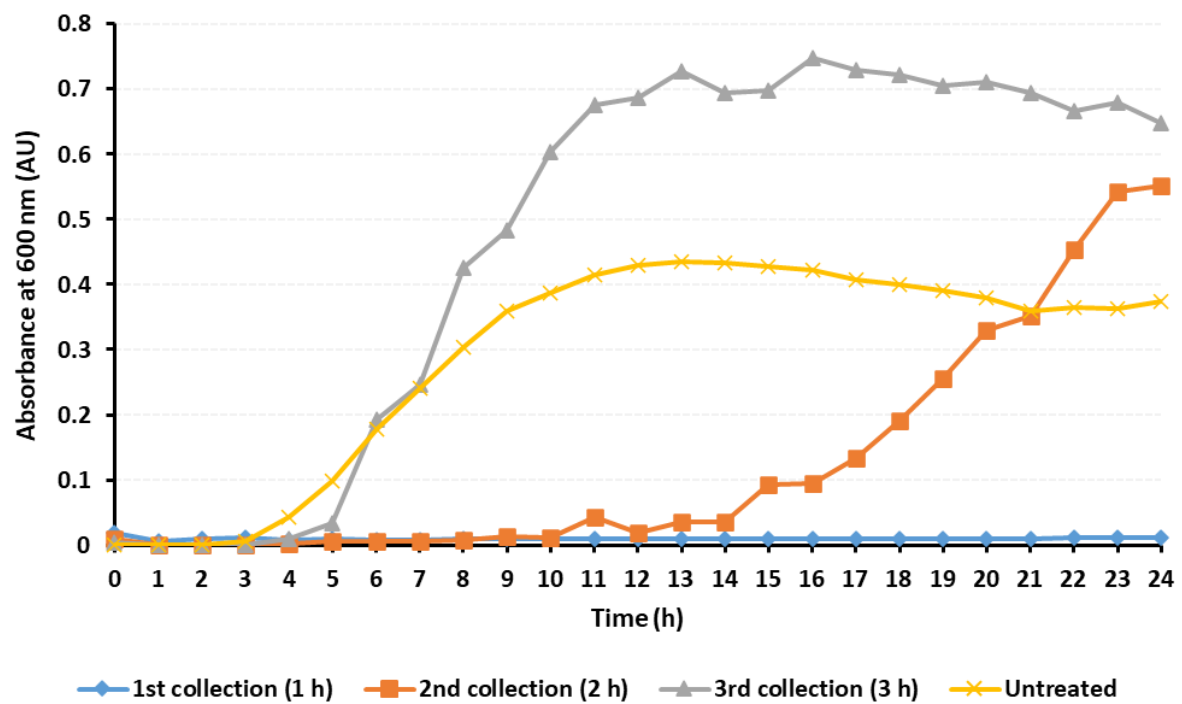

**Figure S3:** *S. aureus* growth was monitored in h-MHB exposed to 10 % GelMA-10 mg mL<sup>-1</sup> extract composites for 1 h intervals.

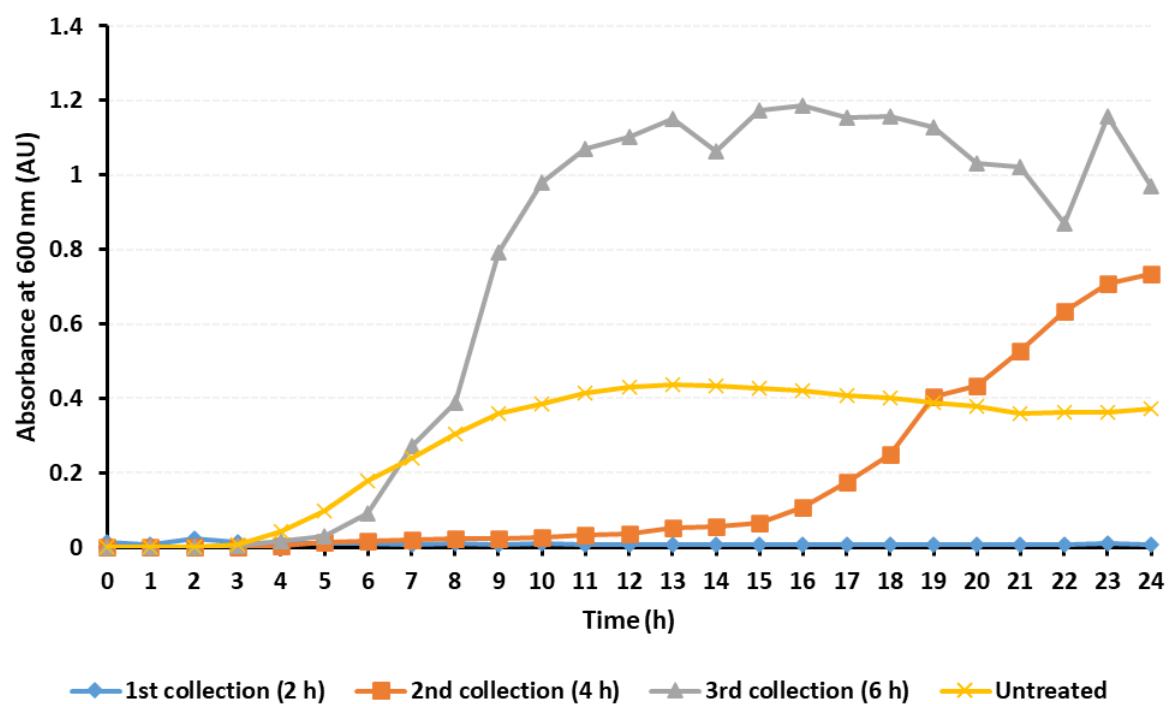

**Figure S4:** *S. aureus* growth was monitored in h-MHB exposed to 10 % GelMA-10 mg mL<sup>-1</sup> extract composites for 2 h intervals.

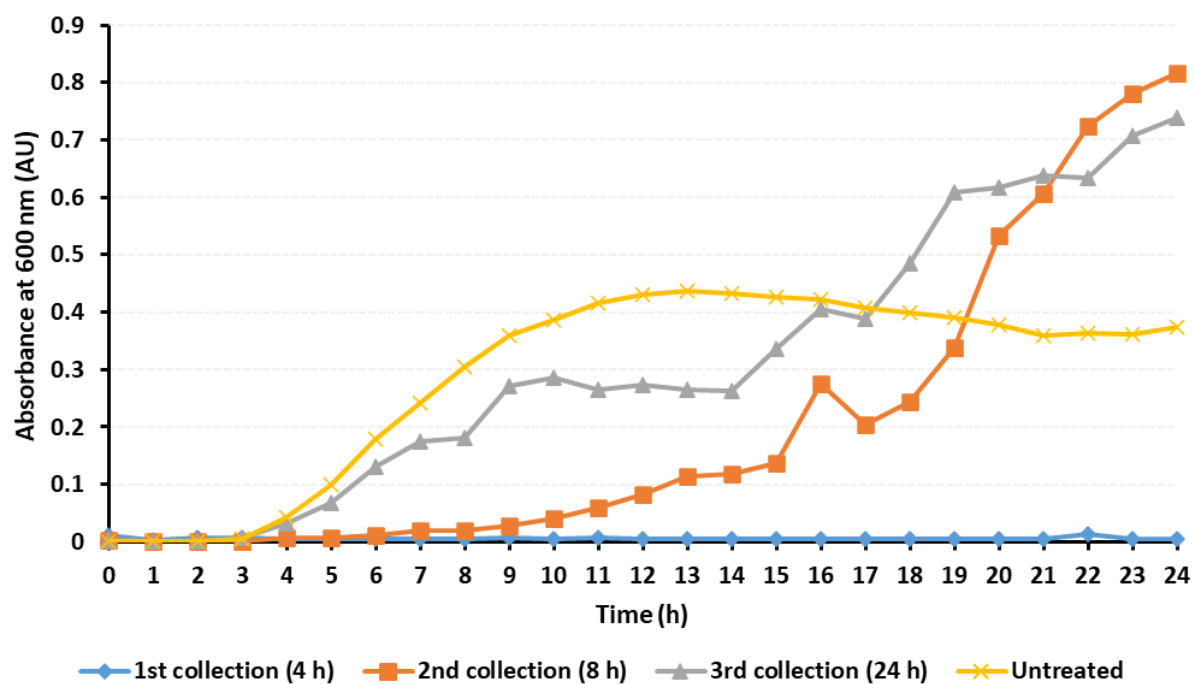

**Figure S5:** *S. aureus* growth was monitored in h-MHB exposed to 10 % GelMA-10 mg mL<sup>-1</sup> extract composites for 4 h intervals.

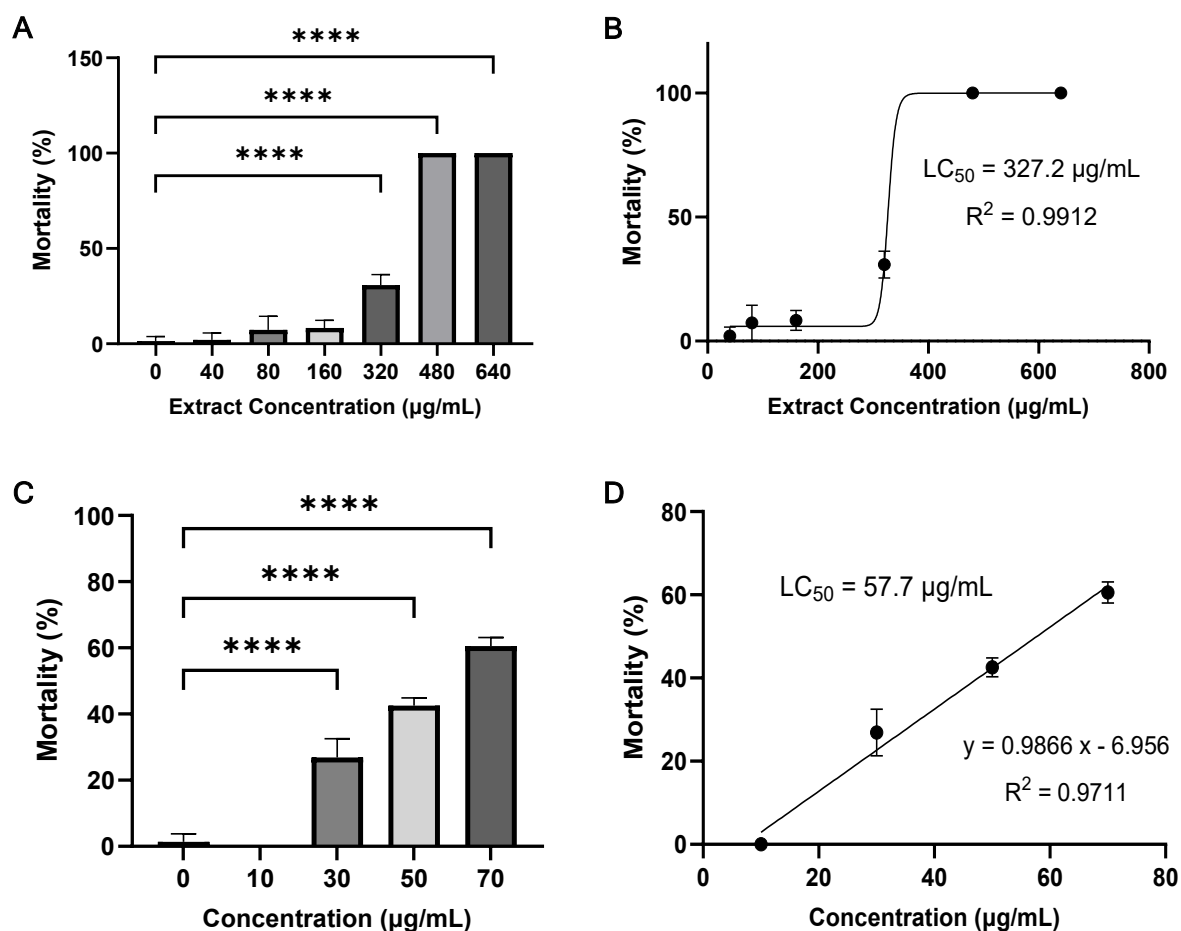

**Figure S6:** Mortality rates of brine shrimp following 24 h exposure to different concentrations of the EL 24 EtOAc extract (A) and the  $LC_{50}$  (B). Mortality rates (C) and  $LC_{50}$  (D) of brine shrimp following 24 h exposure to potassium dichromate. All values are displayed as the mean of all measurements, with error bars representing the SD. Statistical significance was calculated as test vs. untreated control ( $0 \mu\text{g mL}^{-1}$ ), where \*\*\*\* =  $p \leq 0.0001$ .
